# Supplementary material for: Predictive Factors of Sensitivity to Elisidepsin, a Novel Kahalalide F-Derived Marine Compound
Source: Mar Drugs. 2013 Mar 20;11(3):944–59. doi: 10.3390/md11030944 (PMC3705381; doi:10.3390/md11030944)
Supplement: Supplementary File 1 — Supplementary Materials (PDF, 908 KB) [file marinedrugs-11-00944-s001.pdf]

# Supplementary Materials

## 1. Methods

### 1.1. Membrane Permeabilization Assays

DU145 cells were cultured at high density in Petri dishes. When confluence was reached, fresh culture medium supplemented with 25 mM HEPES pH 7.4 and 50  $\mu\text{g/mL}$  of propidium iodide (PI), and different concentrations of elisidepsin were added. PI uptake was monitored by fluorescence microscopy. For time-course experiments, the uptake of PI was quantified by plate fluorimetry (531/632 nm) at 37 °C, up to 70 min (1 min intervals), using a Victor3 Multilabel Counter (Perkin Elmer). Results were expressed as relative fluorescent signals.

### 1.2. Cell Cycle Analysis

Cell cycle analysis was assessed by flow cytometry. In brief, cells were seeded onto 25 cm<sup>3</sup> flasks and treated with various concentrations of elisidepsin. At various time-points adherent and non-adherent cells were recovered, washed with PBS, fixed in 70% ethanol and stored at 4 °C until use. Cells were rehydrated in PBS, incubated for 20 min at room temperature with 250  $\mu\text{g/mL}$  RNase A, and for 20 min at 4 °C with 50  $\mu\text{g/mL}$  propidium iodide in the dark. The cell cycle distribution and percentage of apoptotic cells were determined with a flow cytometer (FACSCalibur and Cell Quest Pro software BD, Le-Pont-de-Claix, France). The percentages of apoptotic cells were evaluated using the Annexin V-FITC Apoptosis Detection Kit (Sigma, Saint Quentin Fallavier, France).

## 2. Figures and Tables

**Figure S1.** Cell cycle distributions of DU145 and SKBR3 cells exposed to 0.125, 0.25, 0.5 and 1  $\mu\text{M}$  elisidepsin, after 48 h treatment.

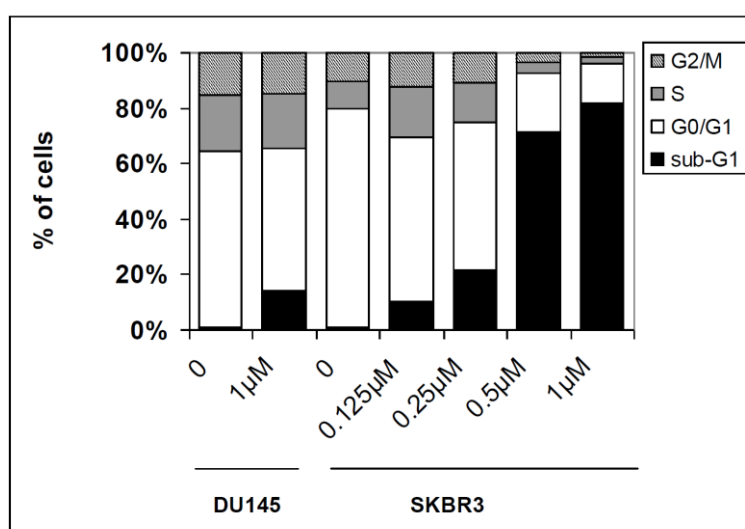

**Figure S2.** Annexin V staining and PARP and caspase-9 protein expression of DU145 cells after treatment with 1  $\mu$ M elisidepsin for indicated times.

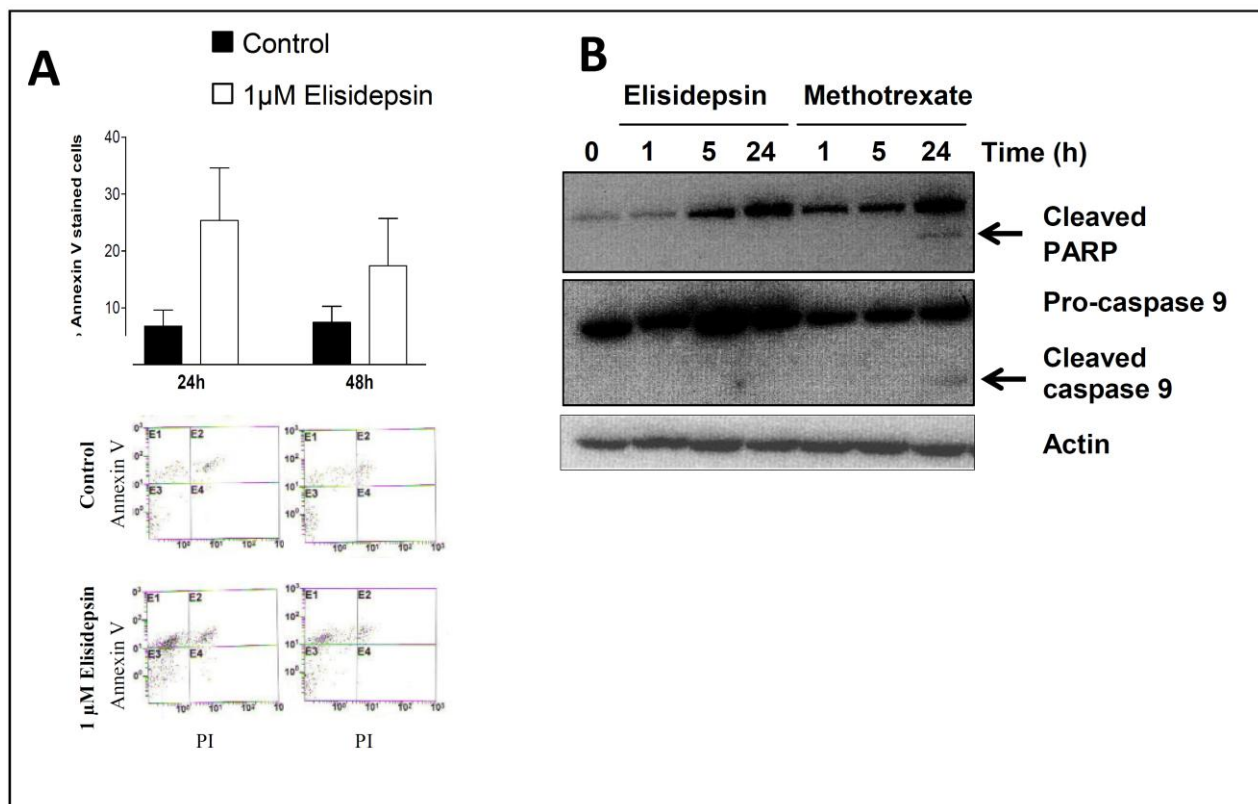

**Figure S3.** Elisidepsin induction of cell membrane permeability in DU145 cell line. Kinetics of IP incorporation after treatment of cells with 0.1, 0.5, 1 and 5  $\mu$ M elisidepsin measured by fluorimetry and visualized by fluorescent microscopy. Cell morphology and PI incorporation in DU145 cells treated for 30 min with 5  $\mu$ M elisidepsin.

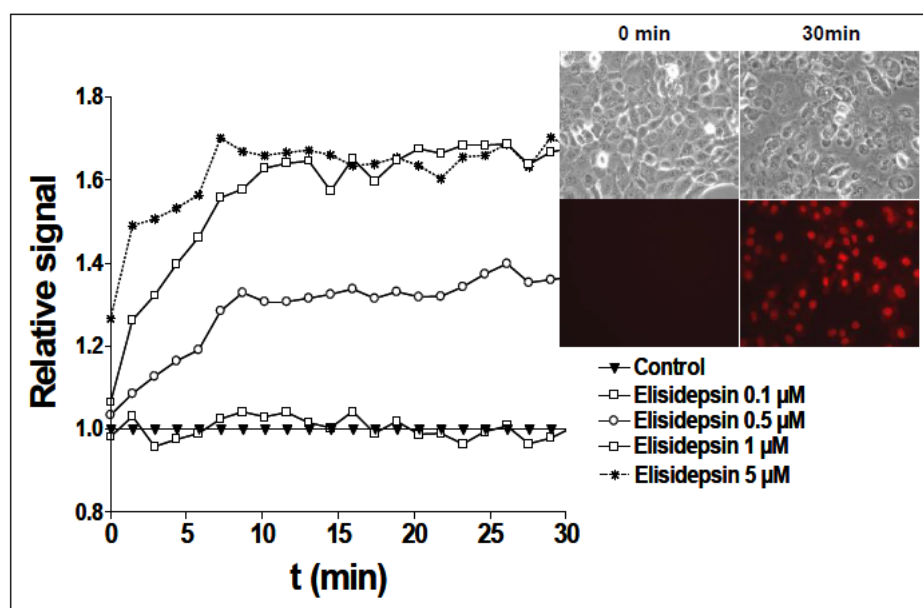

| EGFR expression                                                                                                                                                                                                              | ERBB2 expression                                                                                                                                                                                                            | ERBB3 expression                                                                                                                                                                                                            |
|------------------------------------------------------------------------------------------------------------------------------------------------------------------------------------------------------------------------------|-----------------------------------------------------------------------------------------------------------------------------------------------------------------------------------------------------------------------------|-----------------------------------------------------------------------------------------------------------------------------------------------------------------------------------------------------------------------------|
|                                                                                                                                                                                                                              |                                                                                                                                                                                                                             |                                                                                                                                                                                                                             |
| SKQ20B<br>SCC61<br>HEP2<br>DU145<br>Miapaca2<br>Colo205R<br>MDA231<br>HOP92<br>SK-HEP1<br>IGROV1<br>OVCAR3<br>SKBR3<br>MCF7<br>PC3<br>HOP62<br>HCC2998<br>CAPAN1<br>HT29<br>HCT116<br>MDA361<br>ZR-75-1<br>Colo205<br>MDA435 | SKBR3<br>ZR-75-1<br>Colo205<br>MDA361<br>HT29<br>HCC2998<br>Miapaca2<br>IGROV1<br>DU145<br>CAPAN1<br>Colo205R<br>HOP62<br>SK-HEP1<br>SQ20B<br>SCC61<br>MCF7<br>PC3<br>HEP2<br>OVCAR3<br>HCT116<br>HOP92<br>MDA231<br>MDA435 | SKBR3<br>ZR-75-1<br>HCC2998<br>HT29<br>MDA435<br>MDA361<br>Colo205<br>SCC61<br>MCF7<br>Colo205R<br>PC3<br>SQ20B<br>OVCAR3<br>IGROV1<br>HCT116<br>DU145<br>SK-HEP1<br>CAPAN1<br>HEP2<br>Miapaca2<br>MDA231<br>HOP62<br>HOP92 |

Figure 1 consists of two bar charts. The left chart, titled 'SNAI1', shows relative mRNA expression on a scale from 0 to 140. The DLD-1 control bar is at 0, and the DLD-SNAIL bar is at approximately 115. The right chart, titled 'WISP2', shows relative mRNA expression on a scale from 0 to 1.2. The MCF7 control bar is at 1.0, and the MCF7-WISP bar is at approximately 0.08.

| Gene  | Cell Line | Relative mRNA expression |
|-------|-----------|--------------------------|
| SNAI1 | DLD-1     | 0                        |
|       | DLD-SNAIL | ~115                     |
| WISP2 | MCF7      | 1.0                      |
|       | MCF7-WISP | ~0.08                    |

**Figure S6.** Protein expression levels of  $\beta$ -catenin, Slug, ZEB1, Claudin-1 and ZO-1, in DU145 cells exposed to 1  $\mu$ M elisidepsin for 5 and 24 h, and in DU-PM cells.

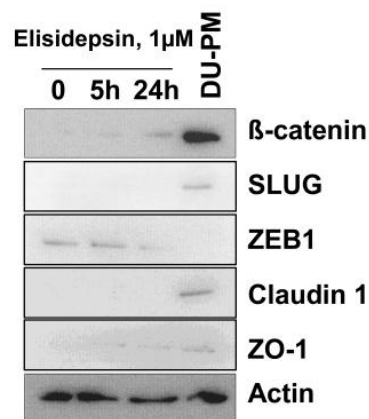

**Figure S7.** Elisidepsin-based combinations in DU145 colon cancer cells. The following three schedules were investigated using the Chou and Talalay method: Elisidepsin exposure for 24 h followed by 24 h exposure to lapatinib, cisplatin, oxaliplatin or gemcitabine; 24 h exposure to lapatinib, cisplatin, oxaliplatin or gemcitabine followed by 24 h exposure to elisidepsin; exposure of elisidepsin for 24 h along with chemotherapies.

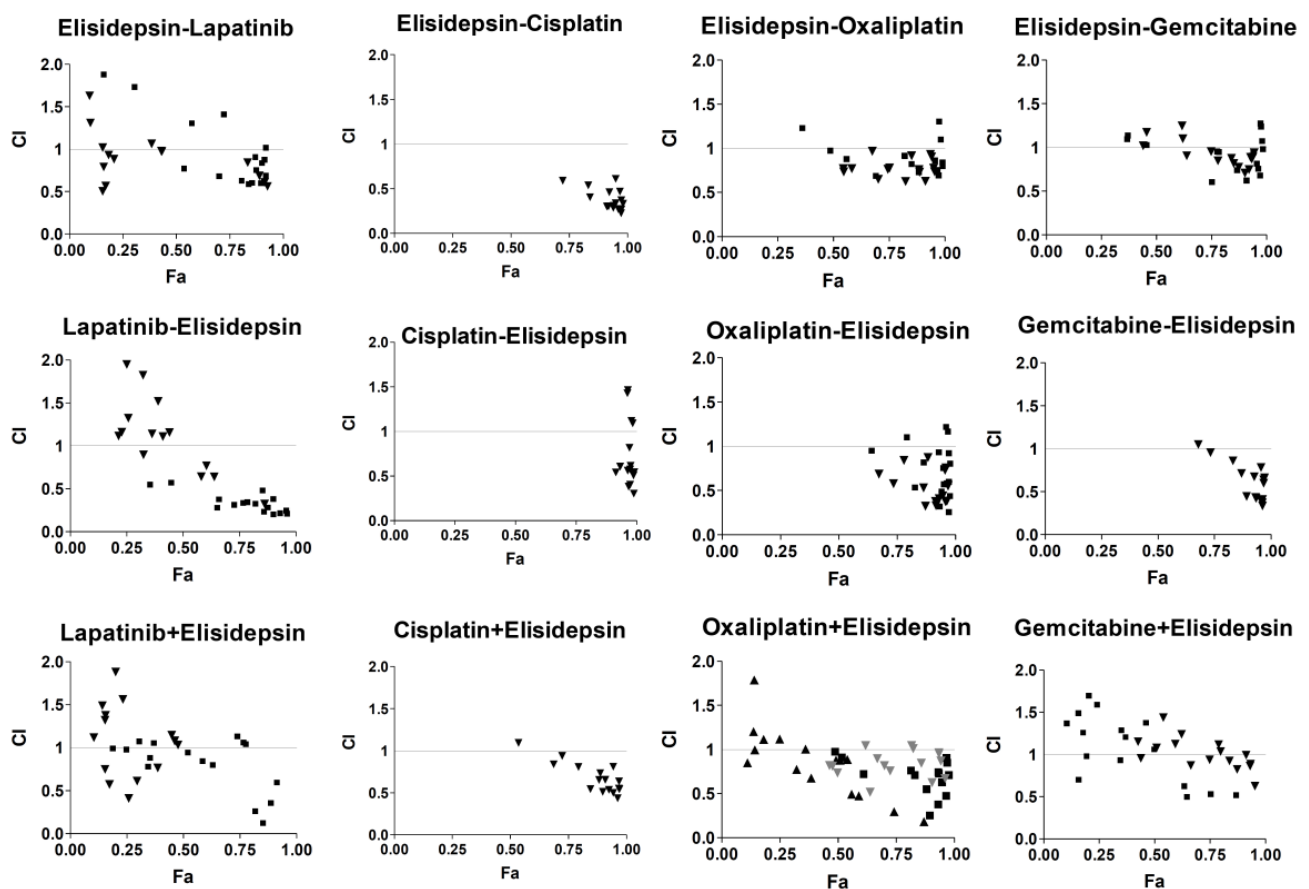

**Table S1.** IC50s of elisidepsin given for 24, 48 and 72 h in a panel of human cancer cell lines.

| Cell line  | Tumor type      | IC50 (μM)    |              |            |
|------------|-----------------|--------------|--------------|------------|
|            |                 | 24 h         | 48 h         | 72 h       |
| SKBR3      | Breast          | 0.43 ± 0.09  | 0.54 ± 0.11  | 0.50 ± 0.1 |
| MCF7       | Breast          | 3.51 ± 0.70  | 9.86 ± 1.99  | 8.00 ± 2.7 |
| Colo205    | Colon           | 0.53 ± 0.11  | 1.17 ± 0.23  | 0.75 ± 0.2 |
| HCC2998    | Colon           | 0.92 ± 0.18  | 1.14 ± 0.23  | 1.20 ± 0.4 |
| HT29       | Colon           | 9.60 ± 1.90  | 10.30 ± 2.10 | 3.70 ± 0.8 |
| Colo205R   | Colon           | 8.40 ± 1.68  | 10.98 ± 2.20 | 6.10 ± 2.1 |
| HCT116     | Colon           | 7.87 ± 1.57  | 5.82 ± 1.16  | 7.20 ± 2.2 |
| HEP2       | Head and Neck   | 3.20 ± 0.64  | 6.80 ± 1.36  | 4.30 ± 1.2 |
| SCC61      | Head and Neck   | 7.25 ± 1.45  | 6.20 ± 1.24  | 5.60 ± 1.8 |
| SK-HEP1    | Hepatocarcinoma | 6.64 ± 1.33  | 8.89 ± 1.78  | 6.00 ± 1.9 |
| HOP62      | Lung            | 6.02 ± 1.20  | 10.14 ± 2.03 | 6.30 ± 1.9 |
| HOP92      | Lung            | 7.16 ± 1.43  | 10.30 ± 2.06 | 8.00 ± 2.9 |
| MDA-MB-435 | Melanoma        | 4.42 ± 0.88  | 4.18 ± 0.84  | 4.40 ± 0.9 |
| IGROV1     | Ovarian         | 1.59 ± 0.32  | 5.48 ± 1.10  | 4.20 ± 0.8 |
| OVCAR3     | Ovarian         | 8.40 ± 1.68  | 7.31 ± 1.46  | 7.30 ± 2.2 |
| CAPAN1     | Pancreas        | 10.07 ± 2.01 | 12.86 ± 2.57 | 5.00 ± 1.6 |
| MiaPaCa2   | Pancreas        | 14.94 ± 2.99 | 11.91 ± 2.38 | 8.80 ± 3.1 |
| DU145      | Prostate        | 4.37 ± 0.87  | 2.72 ± 0.54  | 1.26 ± 0.4 |
| PC3        | Prostate        | 0.81 ± 0.16  | 1.34 ± 0.27  | 1.80 ± 0.4 |

**Table S2.** Genes analyzed as potential biomarkers of elisidepsin sensitivity.

|        |        |         |        |
|--------|--------|---------|--------|
| ABCB1  | FGFR1  | MUC1    | SNAIL  |
| ACTA2  | FGFR2  | NRP1    | TCF3   |
| BCL2   | FRAP1  | NRP2    | TGFB1  |
| CDC25B | GAL S1 | PAI1    | TGFB2  |
| CDH1   | GAL S3 | PAR1    | TGFB3  |
| CDH2   | GAL S8 | PDGFRA  | TNF    |
| CDKN1A | GATA3  | PDGFRB  | TWIST  |
| CLDN1  | HGF    | PIK3CA  | VEGFA  |
| CLDN4  | HIF1A  | PROK1   | VEGFB  |
| COX2   | HMGA2  | PROM1   | VEGFC  |
| CSF1R  | HMOX1  | PTEN    | VEGFD  |
| CXCL12 | IGF1R  | PUMA    | VEGFR1 |
| CXCR4  | IRS1   | RET     | VEGFR2 |
| EDN1   | KI67   | RPS6KB1 | VEGFR3 |
| ELOVL1 | KIT    | SEMA3A  | VIM    |
| ERBB1  | KITLG  | SEMA3B  | ZEB1   |
| ERBB2  | KRT18  | SEMA3F  |        |
| ERBB3  | KRT8   | SIP1    |        |
| ERBB4  | MET    | SLUG    |        |

**Table S3.** Relative mRNA expression of a selection of genes.

| Cell line         | Elisidepsin | Relative mRNA expression |       |       |       |       |        |       |
|-------------------|-------------|--------------------------|-------|-------|-------|-------|--------|-------|
|                   | IC50s       | ERBB1                    | ERBB2 | ERBB3 | ERBB4 | VIM   | CDH1   | MUC1  |
| <b>ZR-75-1</b>    | 0.4         | 126                      | 1629  | 36015 | 4756  | 3     | 403793 | 35206 |
| <b>SKBR3</b>      | 0.5         | 402                      | 9899  | 39909 | 967   | 27    | 96465  | 10297 |
| <b>Colo205</b>    | 0.75        | 51                       | 562   | 13658 | 0     | 7     | 131877 | 18182 |
| <b>HCC2998</b>    | 1.2         | 269                      | 307   | 26295 | 4     | 7     | 111621 | 18111 |
| <b>MDA-MB-361</b> | 1.25        | 130                      | 554   | 18924 | 0     | 20    | 132570 | 6476  |
| <b>DU145</b>      | 1.26        | 872                      | 264   | 2089  | 0     | 16221 | 44547  | 22482 |
| <b>PC3</b>        | 1.8         | 338                      | 139   | 4091  | 5     | 777   | 69376  | 913   |
| <b>SQ20B</b>      | 3.5         | 9886                     | 186   | 2957  | 0     | 31    | 79121  | 202   |
| <b>HT29</b>       | 3.7         | 186                      | 356   | 25221 | 0     | 10    | 94122  | 633   |
| <b>IGROV1</b>     | 4.2         | 594                      | 284   | 2497  | 2     | 10579 | 43500  | 6913  |
| <b>HEP2</b>       | 4.3         | 1399                     | 136   | 958   | 38    | 10230 | 24     | 15637 |
| <b>MDA-MB-435</b> | 4.4         | 13                       | 60    | 21200 | 30    | 52306 | 3      | 687   |
| <b>MDA-MB-231</b> | 4.7         | 676                      | 72    | 370   | 0     | 34558 | 104    | 392   |
| <b>CAPAN1</b>     | 5           | 203                      | 222   | 1128  | 0     | 58507 | 17     | 3508  |
| <b>SCC61</b>      | 5.6         | 3668                     | 165   | 4915  | 0     | 7     | 99905  | 1628  |
| <b>SK-HEP1</b>    | 6           | 623                      | 202   | 1570  | 0     | 62734 | 8      | 931   |
| <b>Colo205-R</b>  | 6.1         | 743                      | 218   | 4106  | 2     | 30    | 23794  | 386   |
| <b>HOP62</b>      | 6.3         | 336                      | 208   | 144   | 2     | 28165 | 310    | 2419  |
| <b>HCT116</b>     | 7.2         | 165                      | 109   | 2335  | 2     | 24    | 10643  | 245   |
| <b>OVCAR3</b>     | 7.3         | 411                      | 129   | 2660  | 16    | 15    | 29428  | 127   |
| <b>HOP92</b>      | 8           | 669                      | 103   | 73    | 3     | 49633 | 5      | 194   |
| <b>MCF7</b>       | 8           | 379                      | 146   | 4182  | 27    | 32    | 53379  | 3439  |
| <b>MiaPaCa2</b>   | 8.8         | 789                      | 294   | 749   | 0     | 56665 | 2      | 3425  |
